# Supplementary material for: Comparative Performance of the Genolab M and Novaseq 6000 Sequencing Platforms for Transcriptome and LncRNA Analysis
Source: Research Square preprint supplement (doi:10.21203/rs.3.rs-900102/v1), 2021-09-20
Supplement: Supplementary file 1 [file 52b966ca86e7eb29760188f4.xlsx]

## Sheet: Sheet1
Table 2 Summary of SNP identifcation in all samples.
Sample	A->G	G->A	C->T	T->C	Transition	A->C	C->A	A->T	T->A	C->G	G->C	G->T	T->G	Transversion	Total
Bean_mRNA_AB_N_PE150	13754	13281	13327	13609	53971	4549	4512	6766	6591	3330	3342	4450	4538	38078	92049
Bean_mRNA_VZ_N_PE150	13260	12819	12938	13308	52325	4381	4402	6479	6294	3260	3277	4268	4414	36775	89100
Bean_mRNA_YS_N_PE150	13360	12847	12998	13244	52449	4339	4409	6552	6401	3268	3275	4336	4472	37052	89501
Bean_mRNA_AB_G_PE100	13267	12816	12876	13047	52006	4357	4425	6772	6430	3213	3214	4337	4416	37164	89170
Bean_mRNA_VZ_G_PE100	15421	14791	14768	15323	60303	4991	5084	7545	7311	3787	3796	4997	5031	42542	102845
Bean_mRNA_YS_G_PE100	12393	11956	11975	12390	48714	4050	4093	6223	6012	3024	2989	4050	4056	34497	83211
Human_mRNA_AB_N_PE150	28147	19847	19745	27765	95504	4212	4279	3205	3296	5208	5153	4161	4283	33797	129301
Human_mRNA_TG_N_PE150	26667	19444	19386	26452	91949	4069	4152	3028	3060	5298	5168	4101	4049	32925	124874
Human_mRNA_VZ_N_PE150	23206	18098	17877	23211	82392	3825	3865	2824	2803	5035	4889	3830	3850	30921	113313
Human_mRNA_YS_N_PE150	18333	15280	15253	18499	67365	3134	3255	2322	2279	4172	4038	3204	3199	25603	92968
Human_mRNA_AB_G_PE100	22677	18164	17955	22700	81496	3785	3797	3340	3365	4702	4605	3799	3840	31233	112729
Human_mRNA_TG_G_PE100	17891	14885	14971	17824	65571	3101	3146	2778	2740	3963	3825	3080	3164	25797	91368
Human_mRNA_VZ_G_PE100	28066	23315	23117	28012	102510	4978	5198	4612	4653	6187	6016	5126	5004	41774	144284
Human_mRNA_YS_G_PE100	16090	14008	13905	16040	60043	2971	3000	2509	2466	3760	3681	2886	3027	24300	84343
Mouse_mRNA_AB_N_PE150	1868	1186	1205	1833	6092	342	386	428	460	362	377	372	340	3067	9159
Mouse_mRNA_VZ_N_PE150	2612	1416	1484	2582	8094	424	448	548	531	403	371	457	408	3590	11684
Mouse_mRNA_YS_N_PE150	1998	1311	1263	1989	6561	346	400	387	401	312	274	363	314	2797	9358
Mouse_mRNA_AB_G_PE100	2252	1328	1402	2100	7082	428	456	1069	1025	381	379	439	400	4577	11659
Mouse_mRNA_VZ_G_PE100	2871	1721	1687	2778	9057	620	809	1189	1109	538	524	818	632	6239	15296
Mouse_mRNA_YS_G_PE100	2054	1063	1046	1902	6065	296	253	711	719	273	268	291	270	3081	9146
Note: A->G means base A mutation as base G, Transition are interchanges of two-ring purines (A->G and G->A) or of one-ring pyrimidines (C->T and T->C), Transversions are interchanges of purine for pyrimidine bases, which therefore involve exchange of one-ring and two-ring structures.
