# Supplementary material for: Comparative Performance of the Genolab M and Novaseq 6000 Sequencing Platforms for Transcriptome and LncRNA Analysis
Source: Research Square preprint supplement (doi:10.21203/rs.3.rs-900102/v1), 2021-09-20
Supplement: Supplementary file 3 [file e6bfc54614d91bbd4c0e7243.xlsx]

## Sheet: Sheet1
Table 3 Summary of InDel identifcation
Sample	Intergenic	Intragenic	Intron	Upstream	Downstream	UTR_5_Prime	UTR_3_Prime	Splice_Site_Acceptor	Splice_Site_Donor	Start_Lost	Frame_Shift	Codon_Deletion	Codon_Insertion	Codon_Change_Plus_Codon_Deletion	Codon_Change_Plus_Codon_Insertion	Stop_Gained	Other	Total
Bean_mRNA_AB_N_PE150	117	2	2609	4131	3784	1709	2313	12	21	6	665	46	78	82	59	0	1857	17491	0.74707
Bean_mRNA_VZ_N_PE150	94	2	2363	3972	3406	1814	2082	15	24	6	604	49	85	83	61	1	1730	16391	0.909096
Bean_mRNA_YS_N_PE150	92	1	2116	3578	3096	1550	2040	14	16	5	440	49	88	85	60	0	1529	14759	0.69666
Bean_mRNA_AB_G_PE100	76	0	1887	3078	2770	1240	1908	9	9	3	494	33	50	52	31	0	1427	13067
Bean_mRNA_VZ_G_PE100	102	0	2172	3656	3079	1641	1961	12	14	3	528	38	58	61	41	1	1534	14901
Bean_mRNA_YS_G_PE100	57	0	1328	2370	2163	1099	1619	13	10	3	331	32	44	45	31	0	1137	10282
Human_mRNA_AB_N_PE150	569	5	6704	1402	3529	151	2952	2	4	0	71	9	8	16	8	0	2129	17559	0.636312
Human_mRNA_TG_N_PE150	598	4	6378	1597	3737	249	3047	2	4	0	89	12	10	20	11	0	2286	18044	0.508313
Human_mRNA_VZ_N_PE150	607	5	5636	1376	3177	205	2742	2	6	0	72	12	10	17	10	0	1922	15799	0.858535
Human_mRNA_YS_N_PE150	310	3	3578	1110	2628	219	2428	5	4	0	25	12	10	17	9	0	1637	11995	0.644102
Human_mRNA_AB_G_PE100	334	5	3836	779	2336	111	2245	0	3	0	44	6	6	10	5	0	1453	11173
Human_mRNA_TG_G_PE100	248	2	2705	645	1973	129	2093	1	2	0	49	7	6	12	4	0	1296	9172
Human_mRNA_VZ_G_PE100	459	6	4929	1125	2743	148	2380	0	3	0	57	7	6	15	6	0	1680	13564
Human_mRNA_YS_G_PE100	194	3	2062	605	1713	126	1888	1	2	0	23	6	6	12	6	0	1079	7726
Mouse_mRNA_AB_N_PE150	480	47	2323	846	786	43	600	4	2	0	19	2	1	1	0	0	1170	6324	0.639785
Mouse_mRNA_VZ_N_PE150	728	53	3194	1124	1012	53	718	4	3	0	30	2	1	2	0	0	1489	8413	0.588375
Mouse_mRNA_YS_N_PE150	381	31	1444	640	581	43	490	4	3	0	14	1	0	2	1	0	936	4571	0.413039
Mouse_mRNA_AB_G_PE100	295	27	1385	519	532	25	451	3	1	0	15	1	0	0	0	0	792	4046
Mouse_mRNA_VZ_G_PE100	415	34	1752	606	607	30	484	2	3	0	24	1	1	0	0	0	991	4950
Mouse_mRNA_YS_G_PE100	119	12	533	257	278	18	245	2	1	0	6	0	1	0	0	0	416	1888
