# Supplementary material for: Comparative Performance of the Genolab M and Novaseq 6000 Sequencing Platforms for Transcriptome and LncRNA Analysis
Source: Research Square preprint supplement (doi:10.21203/rs.3.rs-900102/v1), 2021-09-20
Supplement: Supplementary file 4 [file 8136c94f401e541960088f7d.xlsx]

## Sheet: Sheet1
Table 1 Summary of basic parameters in six transcriptome and four LncRNA sequencing datasets
Sample ID	Species	RNA Type	GenoLab M (PE100)			NovaSeq 6000 (PE150)
			Reads (M)	Bases (Gb)	Q20(%)	Reads (M)	Bases (Gb)	Q20(%)
T1-3301-2-AB	Bean	Transcriptome	33.7518	6.73583	95.65	24.6738	7.35516	97.45
T1-3301-2-VZ	Bean	Transcriptome	139.685	27.8078	94.25	38.551	11.3991	97.33
T1-3301-2-YS	Bean	Transcriptome	26.8582	5.35804	95.9	23.2	6.90857	97.39
T1-TGF-AB	Human	Transcriptome	33.5378	6.69821	95.06	25.3607	7.57989	97.64
T1-TGF-TG	Human	Transcriptome	29.2986	5.85634	94.31	30.2937	9.06227	97.58
T1-TGF-VZ	Human	Transcriptome	79.4588	15.8495	93.49	33.4926	9.87619	97.54
T1-TGF-YS	Human	Transcriptome	31.1036	6.21463	95.35	24.0908	7.20186	97.62
T1-C1-AB	Mouse	Transcriptome	50.4772	10.0798	94.04	26.2988	7.85646	97.52
T1-C1-VZ	Mouse	Transcriptome	77.9962	15.5526	93.24	36.7802	10.9613	97.26
T1-C1-YS	Mouse	Transcriptome	27.5706	5.50652	94.74	24.1999	7.23142	97.73
T2-TGF-TG	Human	LncRNA	59.7673	11.9366	95.07	44.7096	13.2718	97.37
T2-TGF-VZ	Human	LncRNA	64.0095	12.7908	95.63	62.8742	18.6691	97.95
T2-TGF-YS	Human	LncRNA	36.7412	7.33881	94.89	32.8322	9.79069	97.35
T2-C1-TG	Mouse	LncRNA	69.6922	13.9185	95.05	50.3272	14.9424	97.32
T2-C1-VZ	Mouse	LncRNA	69.9103	13.9677	95.52	39.8006	11.9035	97.42
T2-C1-YS	Mouse	LncRNA	52.0311	10.3889	95.58	34.4021	10.2479	97.57
